# Supplementary material for: Harmful R-loops are prevented via different cell cycle-specific mechanisms
Source: PubMed Central journal article supplement (PMC8298424; doi:10.1038/s41467-021-24737-x), 2021-07-22
Supplement: 41467_2021_24737_MOESM1_ESM.pdf [file 41467_2021_24737_MOESM1_ESM.pdf]

## **Harmful R-loops are prevented via different cell cycle-specific mechanisms**

Marta San Martín-Alonso, María E. Soler-Oliva, María García-Rubio, Tatiana García-Muse \* and Andrés Aguilera \*

*Centro Andaluz de Biología Molecular y Medicina Regenerativa CABIMER, Universidad de Sevilla-CSIC-UPO, 41092 Seville, Spain*

Corresponding authors: E-mails: A A: [aguilo@us.es](mailto:aguilo@us.es)

T G-M: [tatiana.muse@cabimer.es](mailto:tatiana.muse@cabimer.es)

### **SUPPLEMENTARY DATA**

Supplementary figures 1-8

Supplementary Tables 1-5

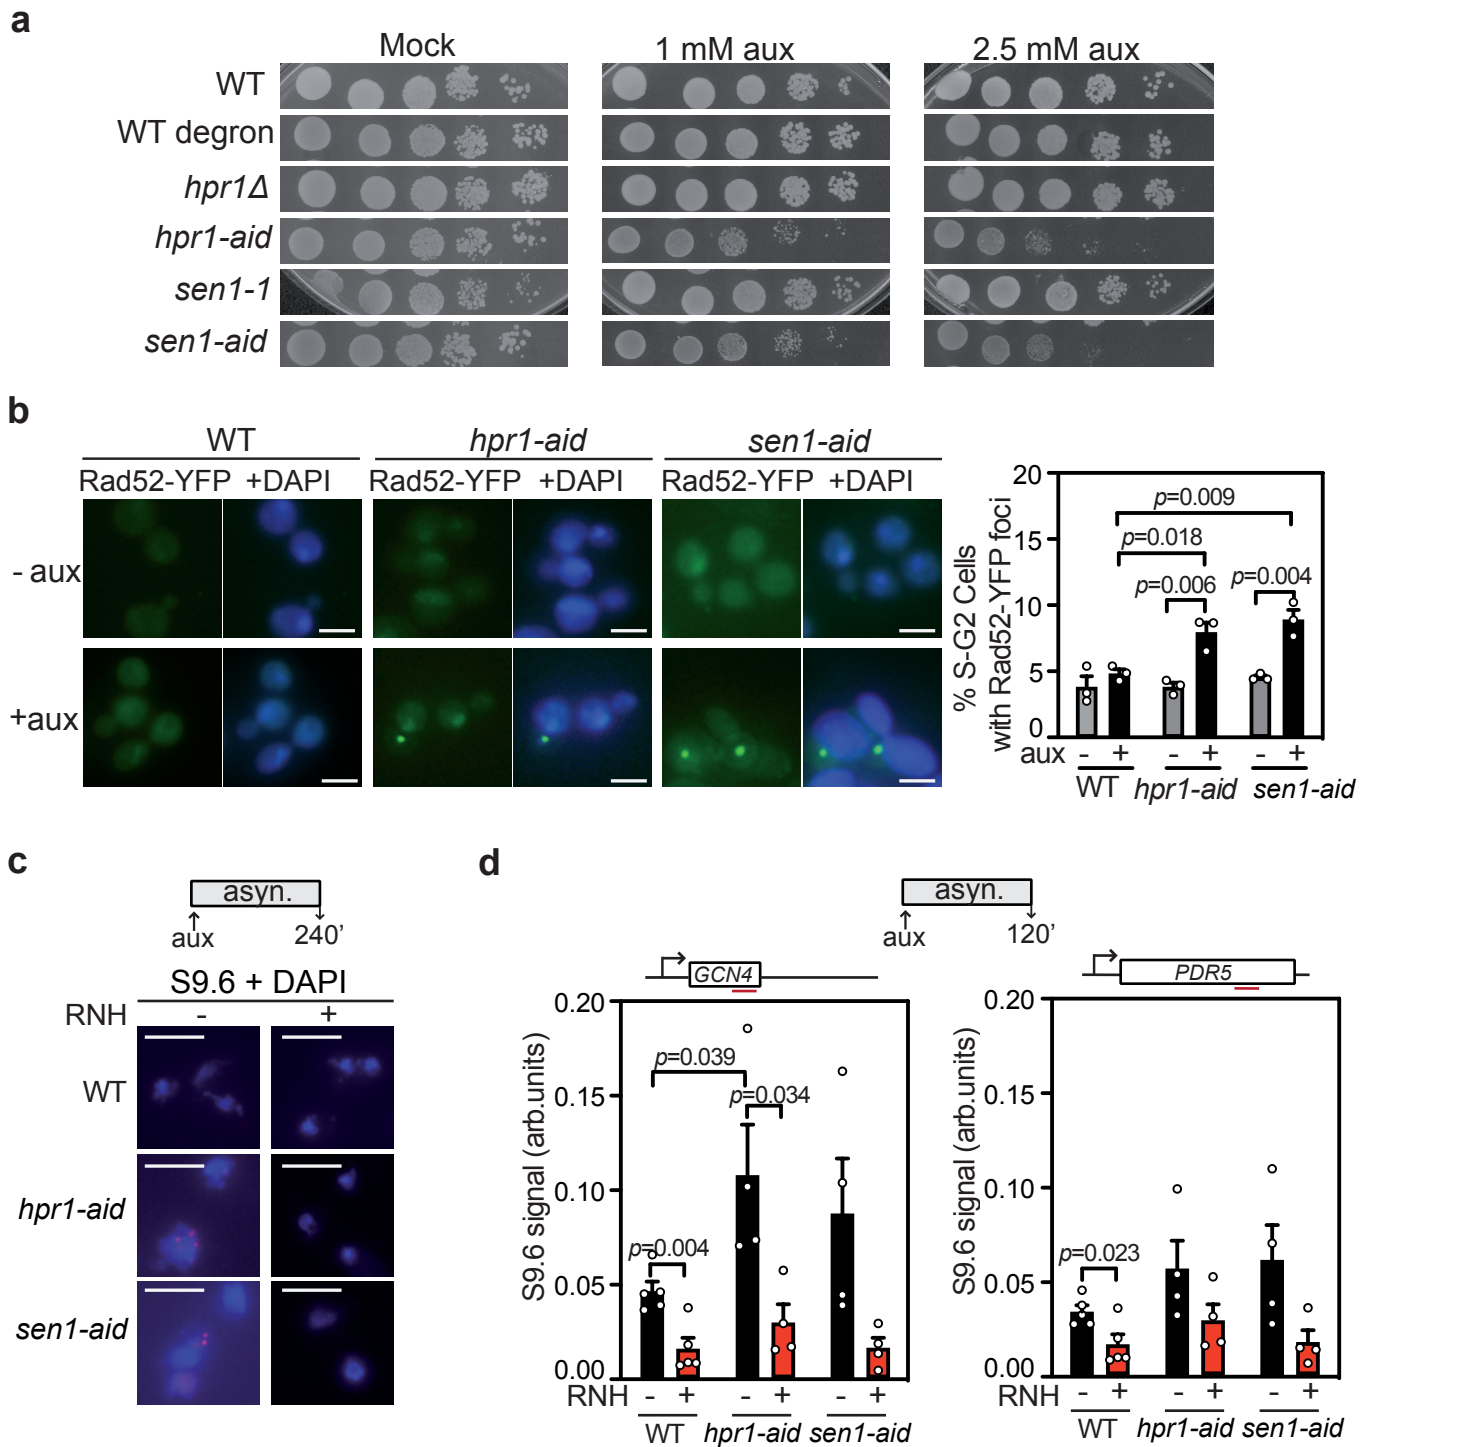

**Supplementary Fig. 1. Fast controlled depletion of Hpr1 and Sen1 using an inducible auxin degron system.** **a.** Serial dilutions of WT, WT-degron, *hpr1* $\Delta$ , *sen1-1* and *hpr1-aid* and *sen1-aid* degron strains in the absence or presence of auxin (IAA). Plates were incubated at 26°C for 2 days. **b.** Representative images of Rad52-YFP foci formation in *hpr1-aid* and *sen1-aid* strains with or without auxin (n=100 cells examined over 3 independent experiments). Data are presented as mean values  $\pm$  SEM. **c.** Representative images of S9.6 foci detected by immunofluorescence on yeast chromosome spreads in WT, *hpr1-aid* and *sen1-aid* asynchronous cells with or without RNH1. **d.** DRIP with S9.6 antibody at *GCN4* and *PDR5* genes in asynchronous cells after 2 hours of auxin addition. WT, *hpr1-aid* and *sen1-aid* were treated (+) or not (-) in vitro with RNH1. Data are presented as mean values  $\pm$  SEM (n=4 biologically independent experiments). A diagram of the experiment is shown at the top of each panel. The P values calculated by the two-tailed unpaired Student t test. Scale bar 5 $\mu$ m. Data underlying this figure are provided as Source data file.

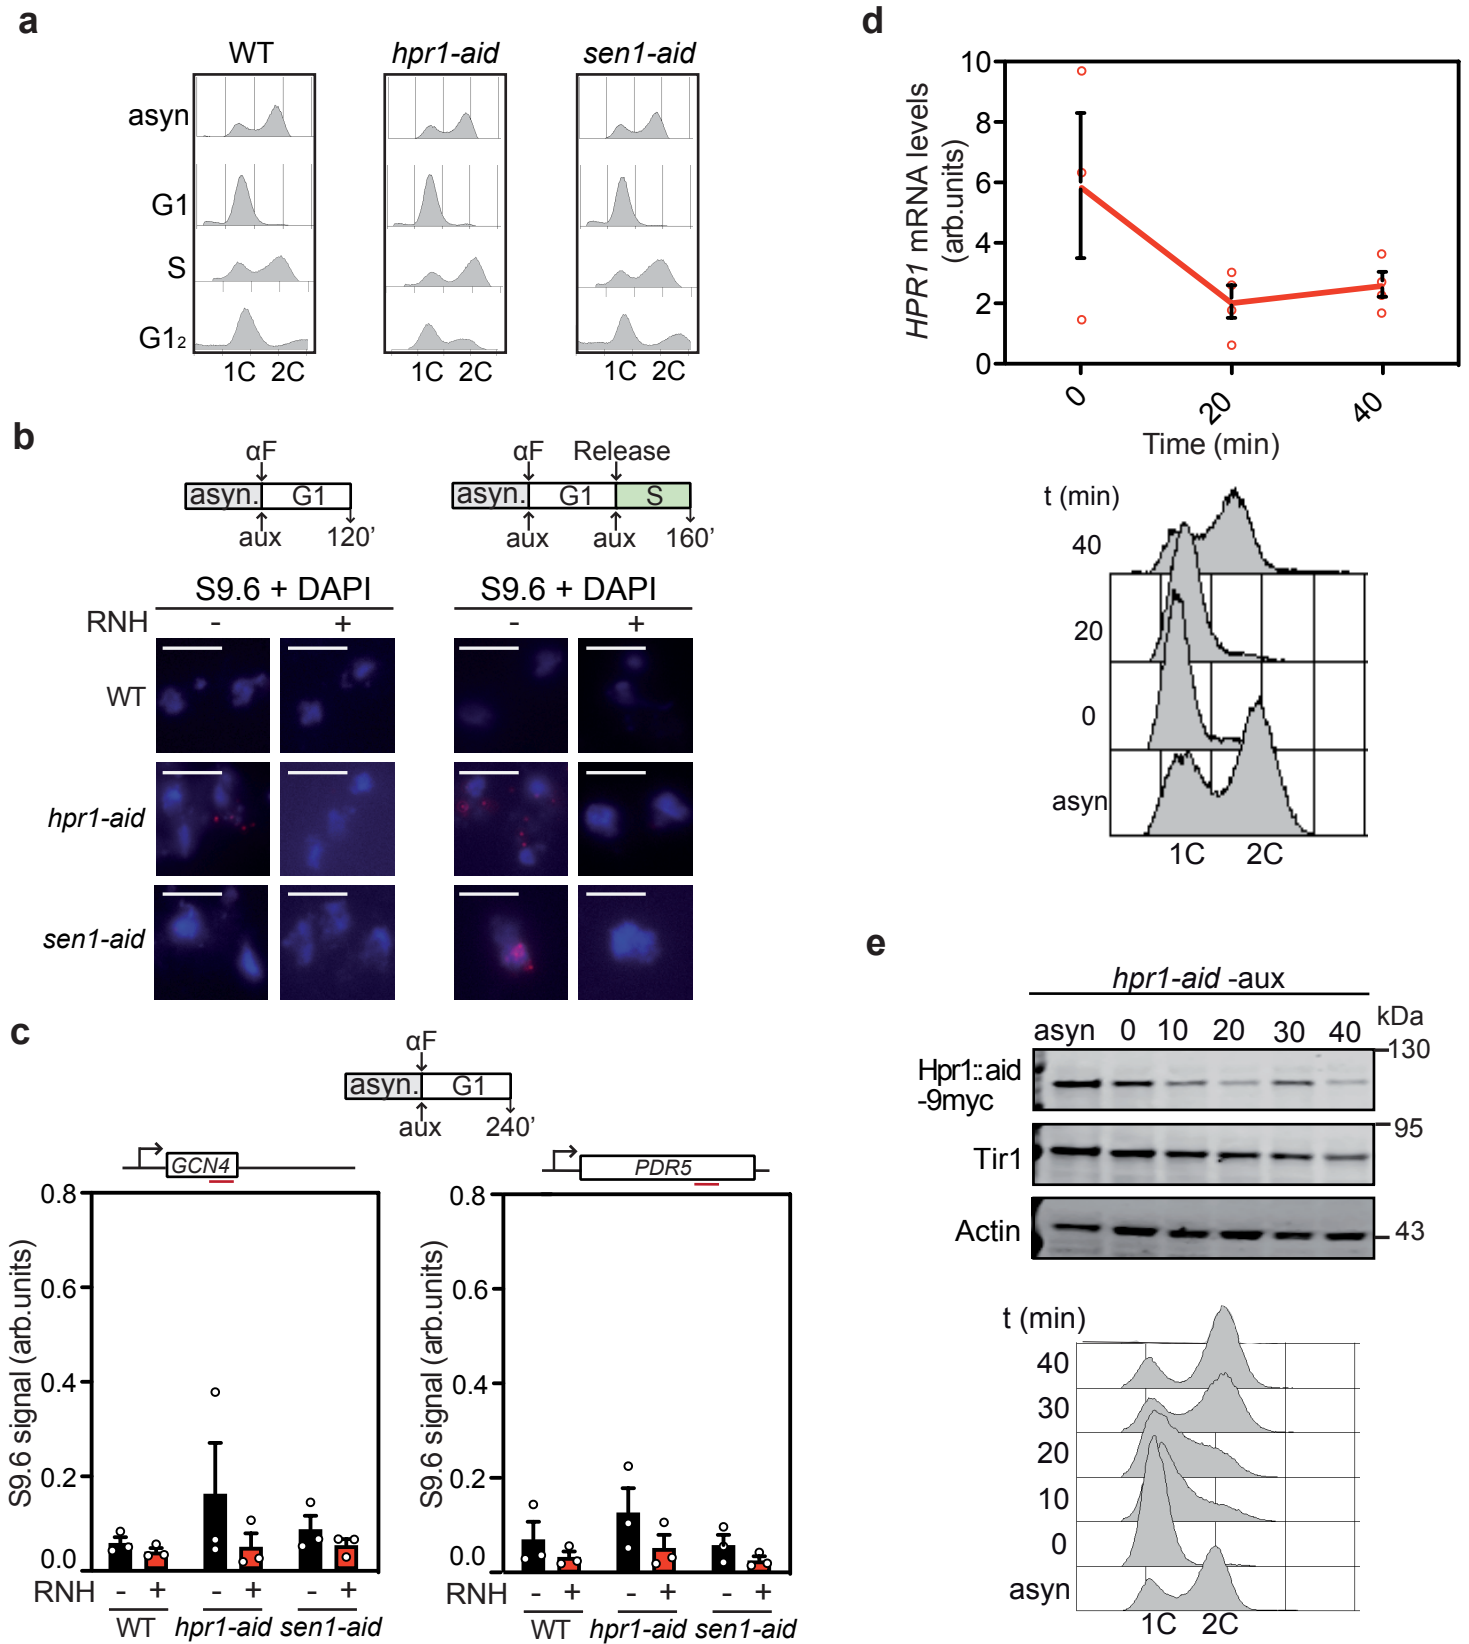

**Supplementary Fig. 2. R-loop accumulation after depletion of Hpr1 and Sen1 using an inducible auxin degron system. a.** DNA content of experiments shown in b, c and Fig. 3 measured by flow cytometry. A diagram of the experiment is shown at the top of each panel. **b.** Representative images of S9.6 foci detected by immunofluorescence on yeast chromosome spreads in WT, *hpr1-aid* and *sen1-aid* arrested in G1 or in S-phase cells with or without RNH1 of the graphs shown in Fig. 3. **c.** DRIP with S9.6 antibody at *GCN4* and *PDR5* genes in G1-synchronized cells after 4 hours of auxin addition. WT, *hpr1-aid* and *sen1-aid* were treated (+) or not (-) in vitro with RNH1. Data are presented as mean values  $\pm$  SEM ( $n=3$  biologically independent experiments). **d.** RT-PCR analysis of the *HPR1* gene normalized respect to *SCR1* gene in *hpr1-aid* cells released from  $\alpha$ -factor. Data are presented as mean values  $\pm$  SEM ( $n=3$  biologically independent experiments). Analysis of cell cycle progression after  $\alpha$ -factor release of cells is shown below the panel. **e.** Immunoblotting with  $\alpha$ Hpr1 of protein extracts of *hpr1-aid* cells without auxin in asynchronous cultures and after release from  $\alpha$ -factor arrest. AtTIR1-9Myc was used as loading control. Analysis of cell cycle progression after  $\alpha$ -factor release of cells is shown below the panel ( $n=2$  biologically independent experiments). Scale bar 5 $\mu$ m. Data underlying this figure are provided as Source data file.

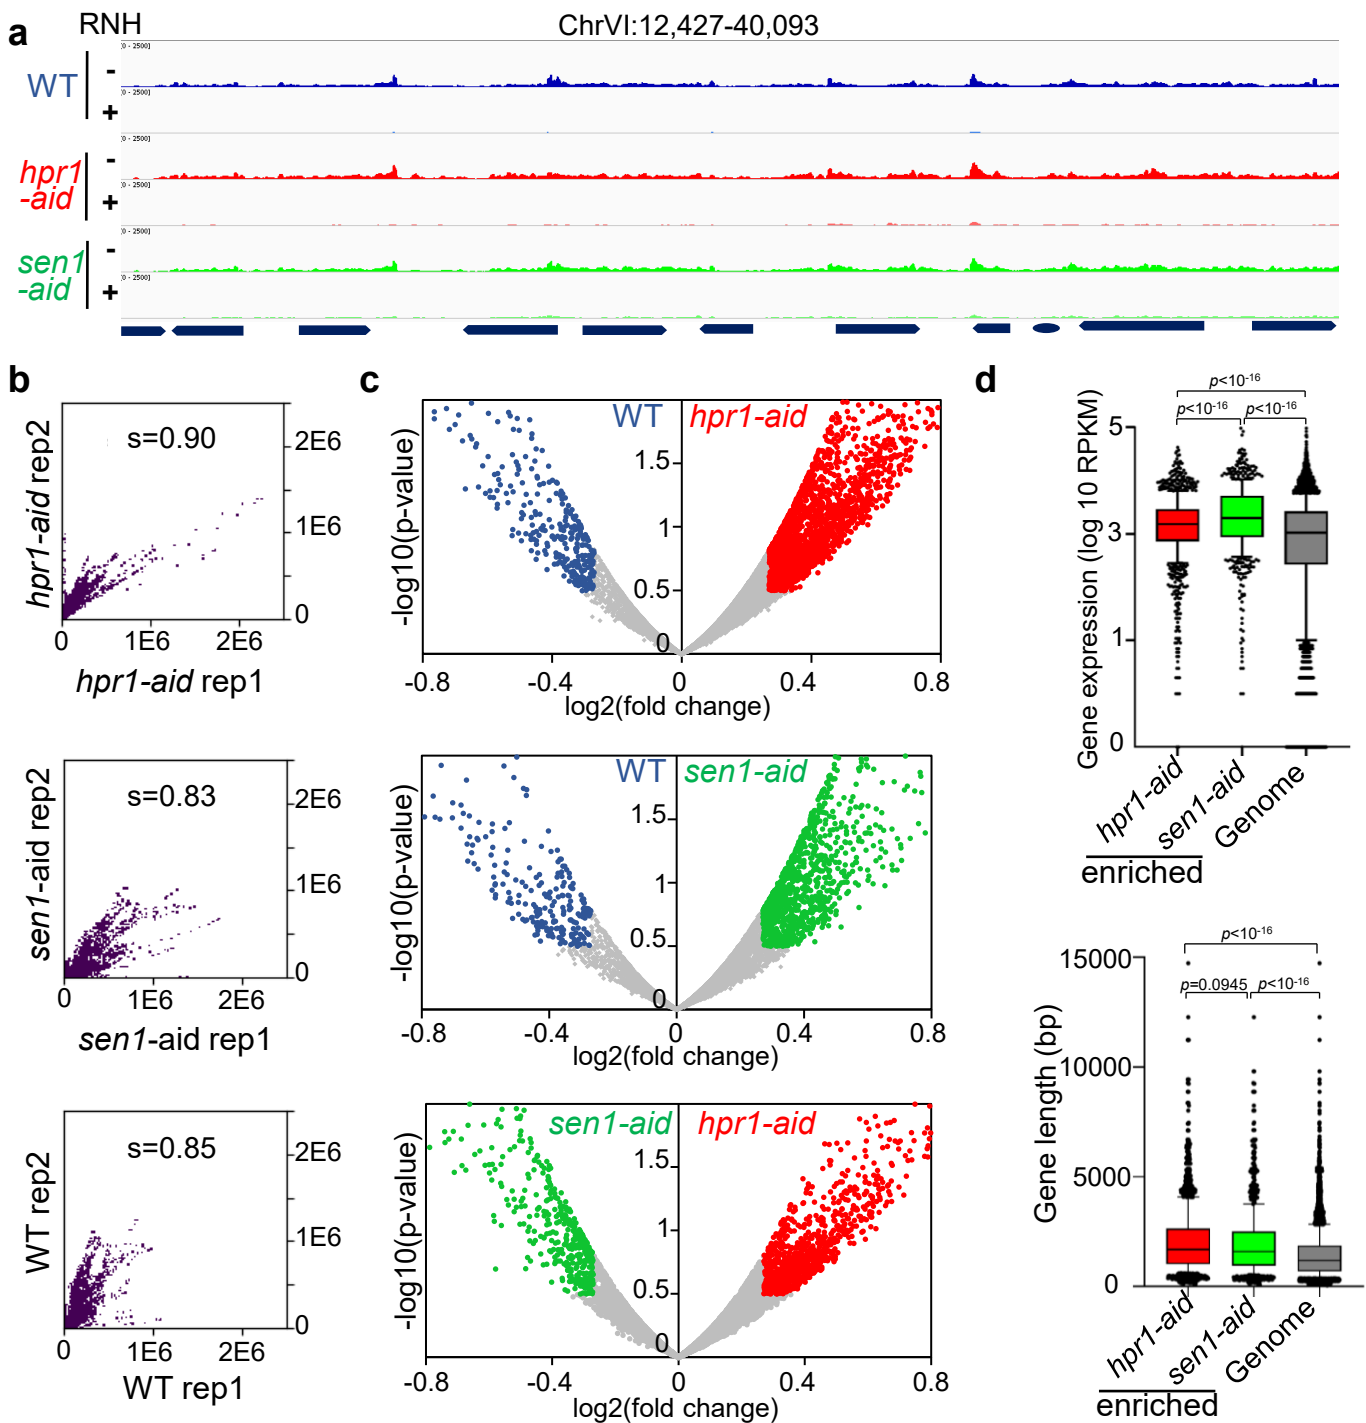

**Supplementary Fig. 3. R-loop genome-wide accumulation after depletion of Hpr1 and Sen1 using an inducible auxin degron system.** **a.** Representative screenshot of a genomic region in which DRIPc-seq signal from WT (blue), *hpr1-aid* (red) and *sen1-aid* (green) cells with or without RNH treatment is plotted. **b.** Correlation plot between the two DRIPc-seq replicas of *hpr1-aid* (top), *sen1-aid* (center) and WT (bottom). Spearman correlation coefficient is shown in each plot. **c.** Volcano plots showing the peaks differential enrichment between WT (blue) and *hpr1-aid* (red); WT and *sen1-aid* (green); and *hpr1-aid* and *sen1-aid* conditions. 1.2 fold-change and 0.6  $-\log_{10}(\text{p-value})$  were set as threshold. **d.** Boxplots showing gene expression (top) and gene length (bottom) distribution of *hpr1-aid* (red,  $n=1243$  genes) and *sen1-aid* (green,  $n=778$  genes) enriched genes, and all the protein coding genes of the genome (grey,  $n=6784$  genes). The median of each pool is shown at the center of the box. Minimum and maximum values represent 10-90 percentile, respectively. Bounds of each box represent 25-75 percentile, respectively. The P values were calculated by the Mann-Whitney U-test, two tailed.

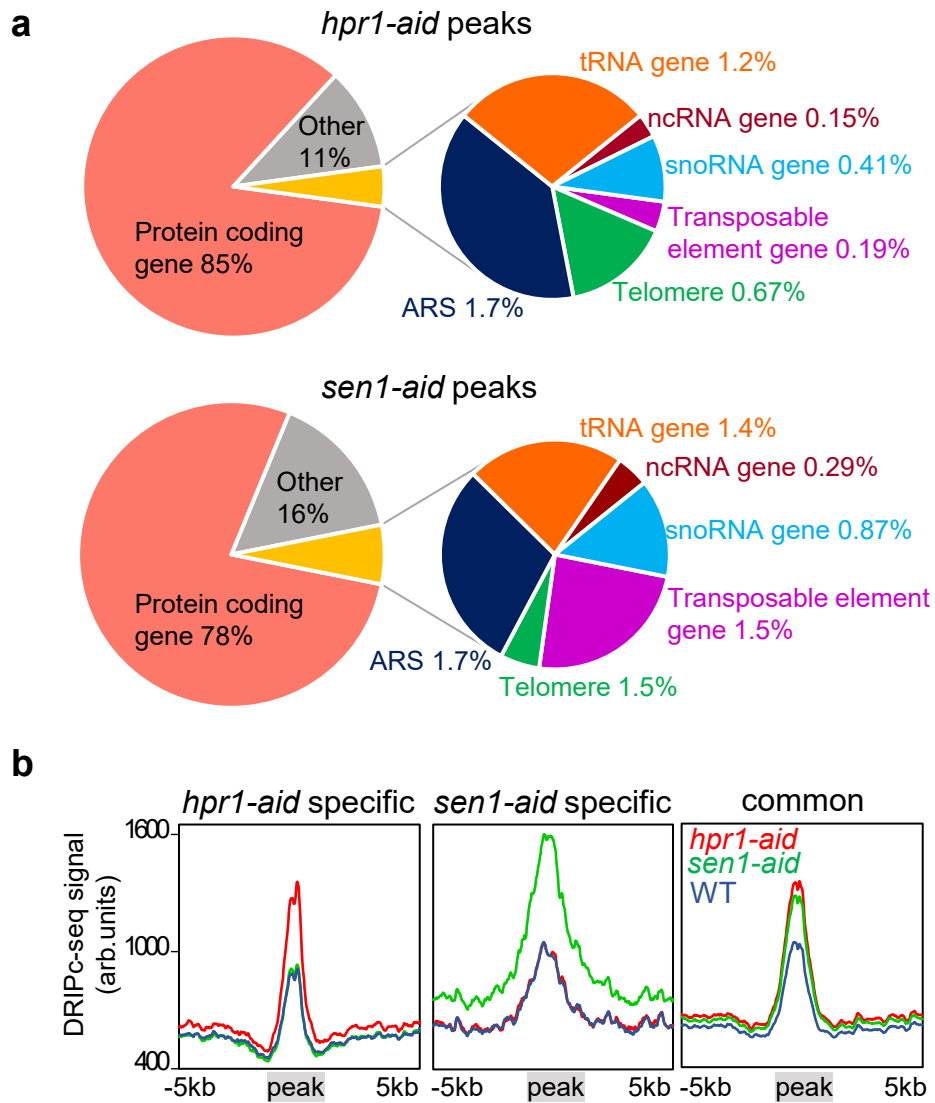

**Supplementary Fig. 4. R-loop distribution after depletion of Hpr1 and Sen1 using an inducible auxin degron system. a.** Increased R-loop peaks across several genomic features enriched in *hpr1-aid* and *sen1-aid* cells compared to WT. **b.** DRIPc-seq signal (average coverage, arbitrary units) metaplot analysis of  $\pm 2$ Kb of specific peaks in *hpr1-aid* and *sen1-aid* cells and common peaks respect to the WT. WT (blue), *hpr1-aid* (red) and *sen1-aid* (green).

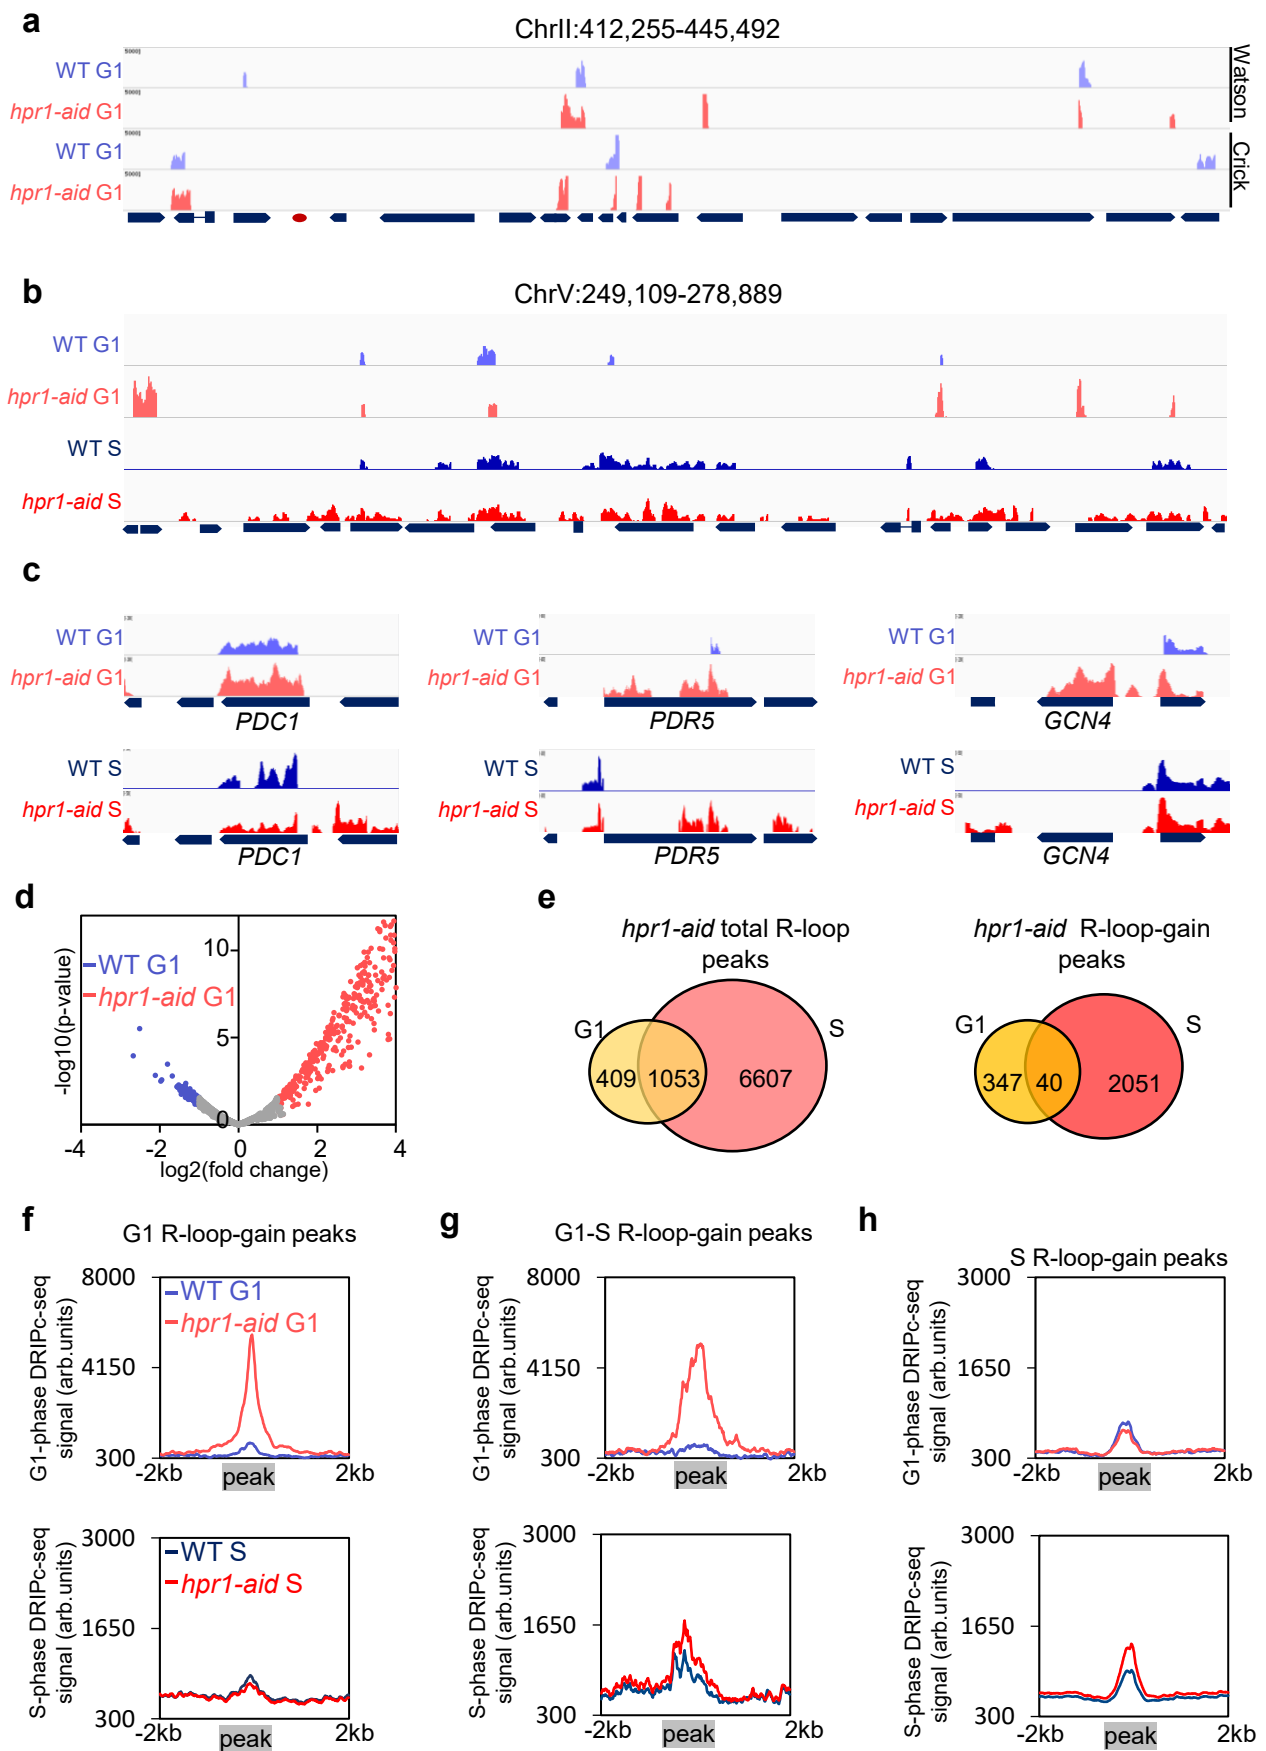

**Supplementary Fig. 5. DNA-RNA hybrids genome wide accumulation after hpr1 depletion in G1 phase.**

**a.** Representative screenshot of a genomic region showing the DRIPc-seq signal of detected peaks profiles of G1 phase for WT (light blue) and *hpr1-aid* (pink) mapped at Watson and Crick strand. **b.** Representative screenshot of a genomic region showing the DRIPc-seq signal of detected peaks profiles for WT (light blue) and *hpr1-aid* (pink) in G1 phase, and WT (dark blue) and *hpr1-aid* (red) in S phase. **c.** Screenshots of *PDC1*, *PDR5* and *GCN4* loci showing the DRIPc-seq signal of detected peaks profiles of G1 phase (top) for WT (light blue) and *hpr1-aid* (pink), and signal of detected peaks profiles of S phase (bottom) for WT (dark blue) and *hpr1-aid* (red). **d.** Volcano plot showing the peaks differential enrichment between WT (light blue) and *hpr1-aid* (pink) G1 phase conditions. 2 fold-change and  $1 - \log_{10}(\text{p-value})$  were set as threshold. **e.** Venn diagrams showing the overlap between total R-loop peaks detected in *hpr1-aid* in G1 and S phases (left); and the overlap between the R-loop-gain peaks detected in *hpr1-aid* in G1 and S phases (right). **f.** DRIPc-seq signal (average coverage, arbitrary units) metaplot analysis of  $\pm 2\text{kb}$  G1 specific R-loop-gain peaks regions for WT (light blue) and *hpr1-aid* (pink) in G1 phase (top) and WT (dark blue) and *hpr1-aid* (red) in S phase (bottom). **g.** DRIPc-seq signal (average coverage, arbitrary units) metaplot analysis of  $\pm 2\text{kb}$  G1-S R-loop-gain peaks regions for WT (light blue) and *hpr1-aid* (pink) in G1 phase (top) and WT (dark blue) and *hpr1-aid* (red) in S phase (bottom). **h.** DRIPc-seq signal (average coverage, arbitrary units) metaplot analysis of  $\pm 2\text{kb}$  S specific R-loop-gain peaks regions for WT (light blue) and *hpr1-aid* (pink) in G1 phase (top) and WT (dark blue) and *hpr1-aid* (red) in S phase (bottom).

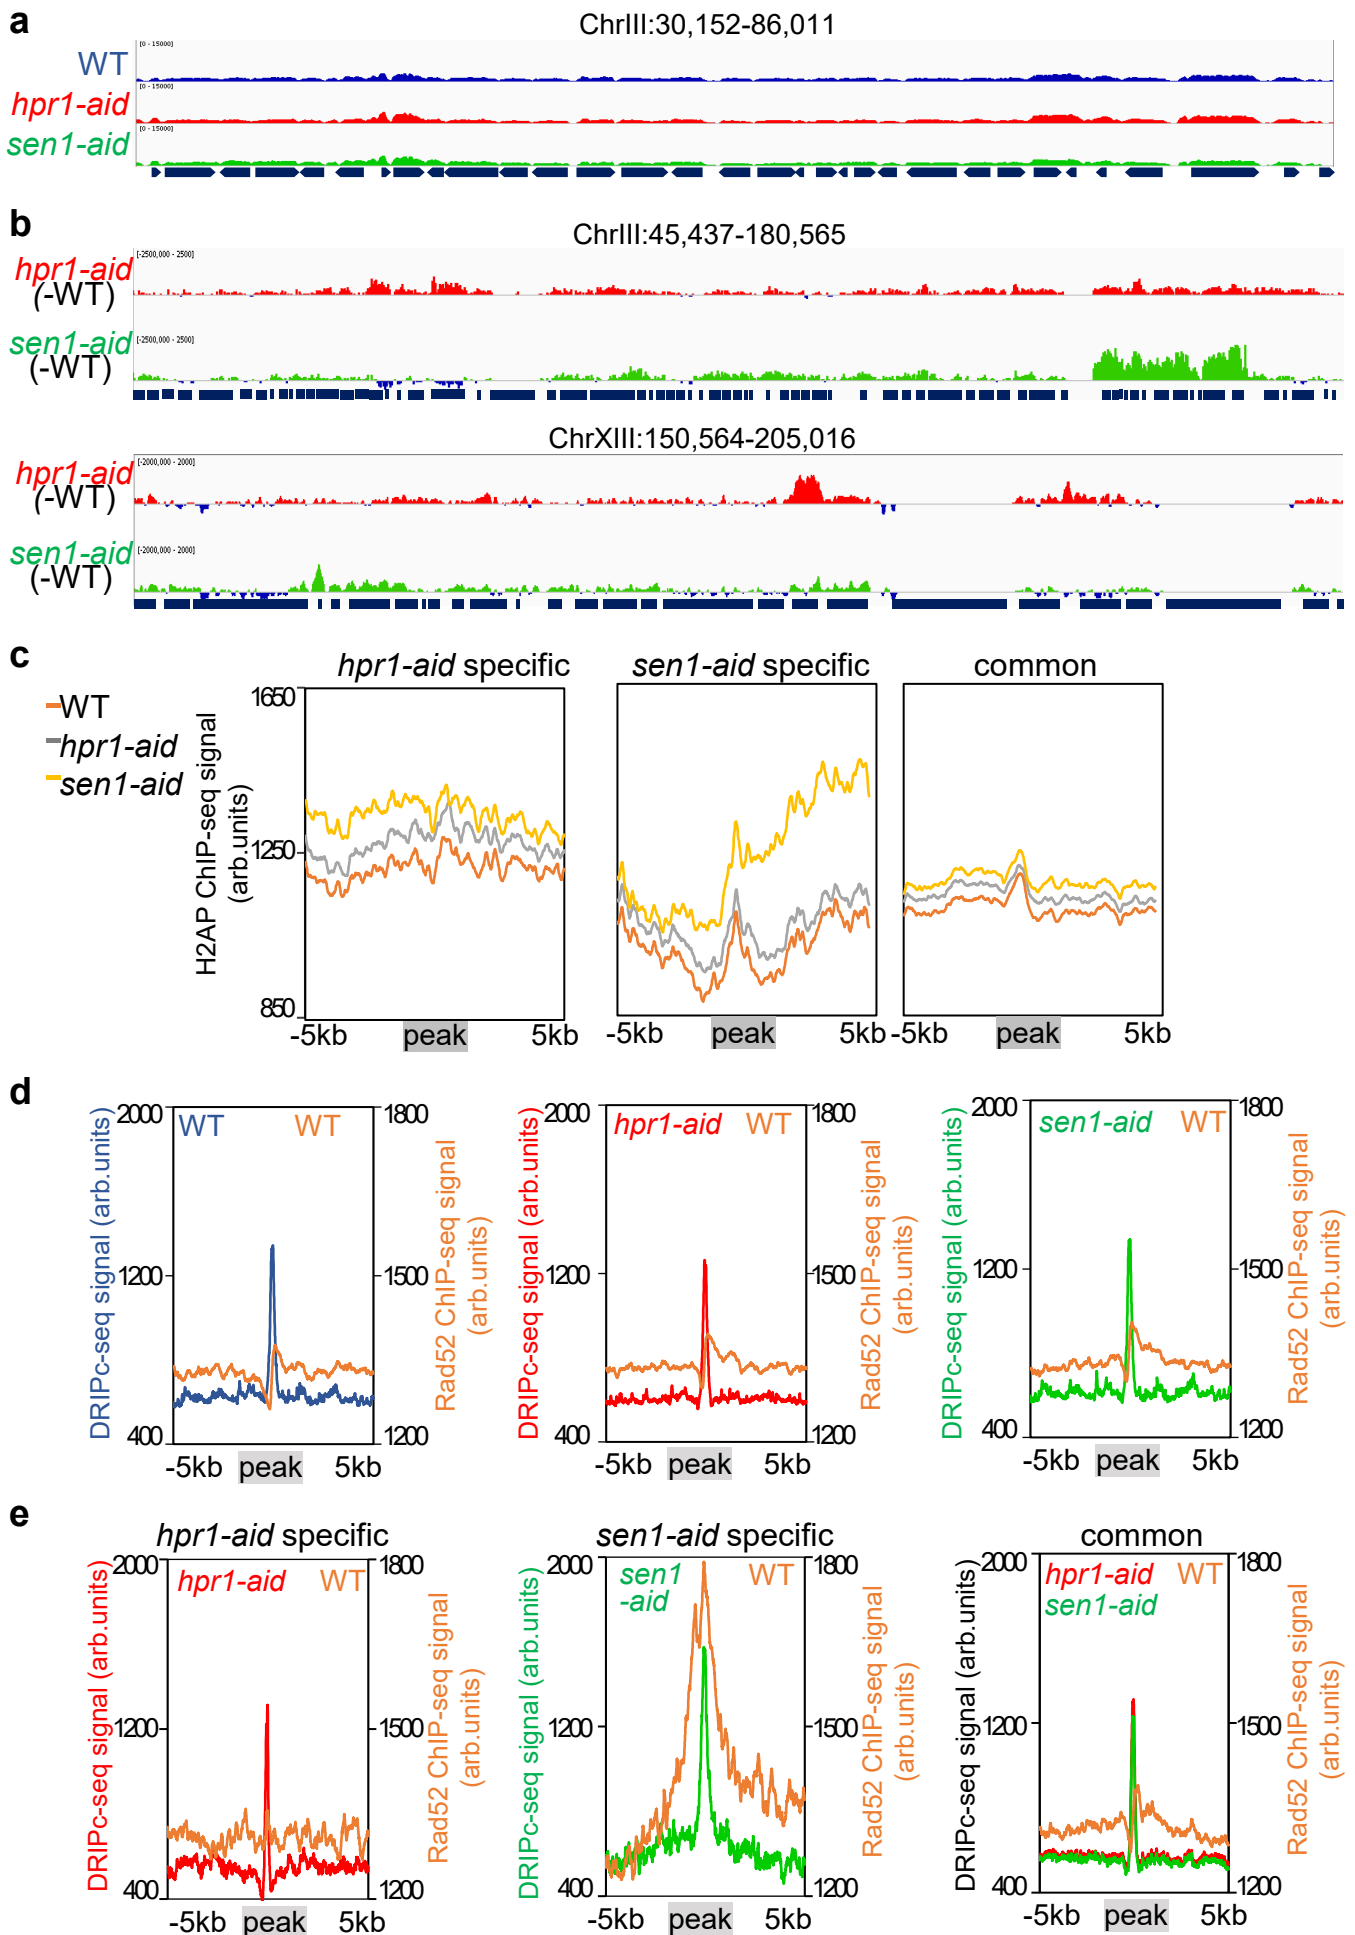



**Supplementary Fig. 6. Genome-wide H2AP distribution, and its correlation with R-loops after depletion of Hpr1 and Sen1 using an inducible auxin degron system.** **a.** Representative screenshots of different genomic regions in which H2AP ChIP-seq signal from WT (blue), *hpr1-aid* (red) and *sen1-aid* (green) cells are shown. **b.** Representative screenshots of different genomic regions in which H2AP ChIP-seq signal from *hpr1-aid* (dark red) and *sen1-aid* (dark green) after subtracting the WT signal is shown. **c.** Metaplot analysis of H2AP ChIP-seq signal (average coverage, arbitrary units) surrounding DRIPc peaks  $\pm 5$ Kb of specific peaks in *hpr1-aid* and *sen1-aid* cells and common peaks respect to the WT, in WT (orange), *hpr1-aid* (grey) and *sen1-aid* (yellow) cells. **d.** Metaplot analysis of DRIPc-seq peaks (average coverage, arbitrary units)  $\pm 5$ Kb and WT Rad52 ChIP-seq signal (orange, average coverage, arbitrary units) in WT (blue), *hpr1-aid* (red) and *sen1-aid* (green) cells. **e.** Metaplot analysis of DRIPc-seq peaks (average coverage, arbitrary units)  $\pm 5$ Kb and WT Rad52 ChIP-seq signal (orange, average coverage, arbitrary units) of specific peaks in *hpr1-aid* and *sen1-aid* cells and common peaks respect to the WT, in WT (blue), *hpr1-aid* (red) and *sen1-aid* (green) cells.

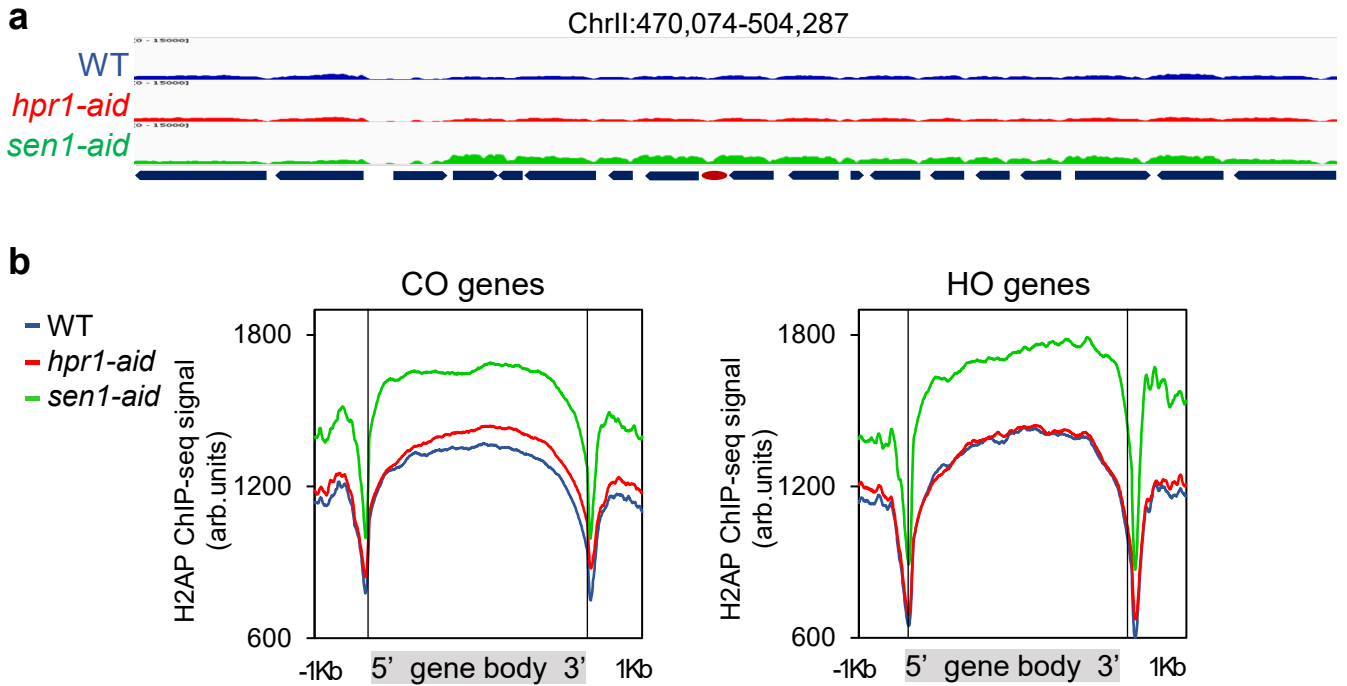

**Supplementary Fig. 7. R-loop and H2AP distribution in early ARS in *hpr1* and *sen1* conditional mutants.**

**a.** Representative screenshots of a genomic region containing an ARS in which H2AP ChIP-seq signal from WT (blue), *hpr1-aid* (red) and *sen1-aid* (green) cells are shown. **b.** Distribution of H2AP ChIP-seq signal (average coverage, arbitrary units) along HO and CD genes metaplot for WT (blue), *hpr1-aid* (red) and *sen1-aid* (green) cells.

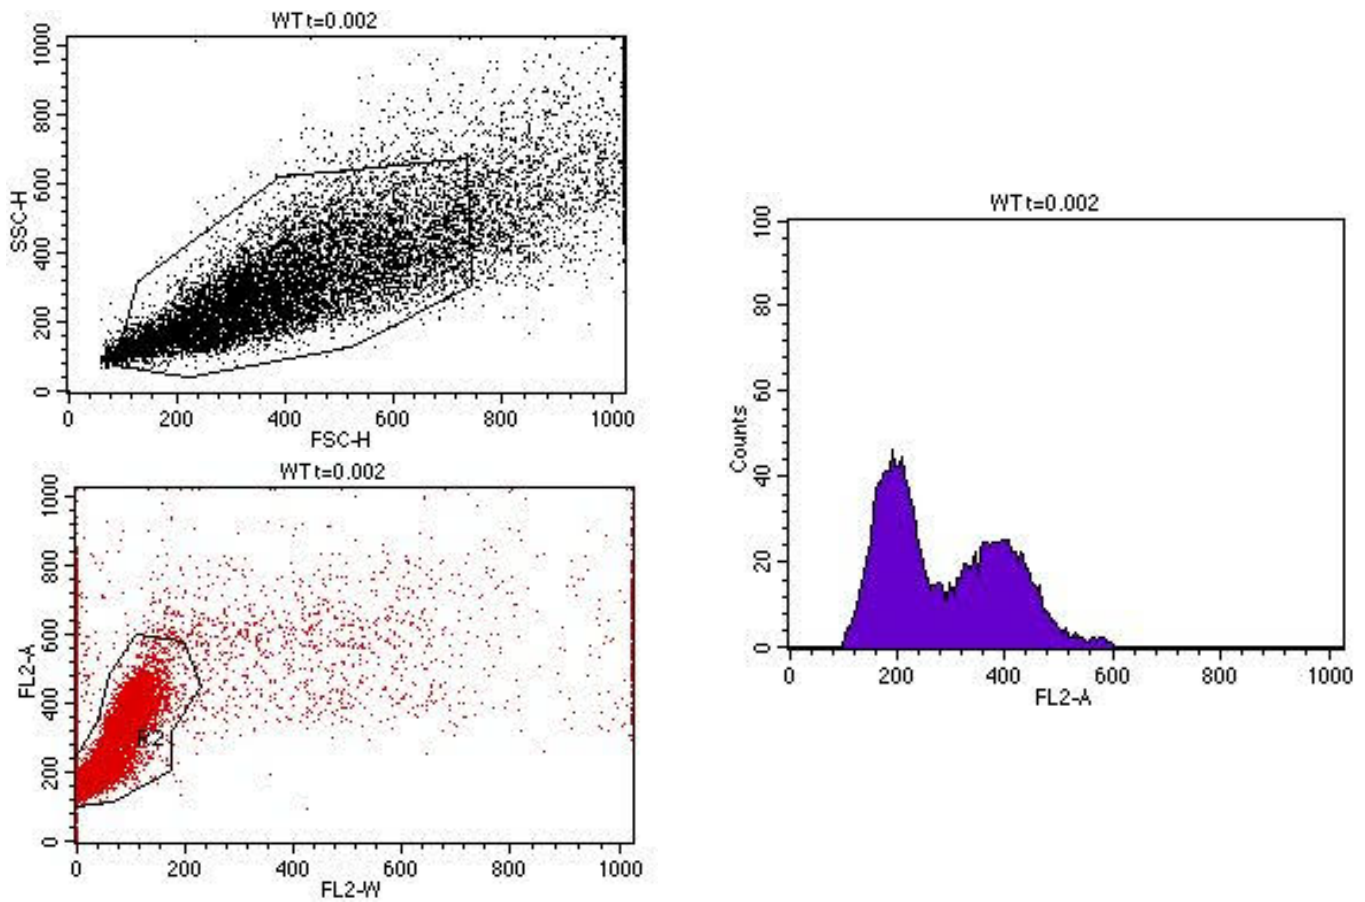

**Supplementary Fig. 8. Gating strategy in flow cytometry experiments.** Side scatter (SSC-A) and forward scatter (FSC-A) are plotted against each for two populations: smaller G2 and larger cells G1. Yeast cells were gated for size and propidium iodide (PI) intensity. PI analysis permitted to differentiate cell cycle stages, and yeast were sorted into the populations asynchronous, G1, and S. The same strategy was followed in the figures 2a, S2a, S2d and S2e.

FL2-A: total cell fluorescence , FL2-W: pulse width, SSC-H: side scatter.

Supplementary Table 1. Yeast strains used in this study.

| Strain         | Genotype                                                                                           | Source                                    |
|----------------|----------------------------------------------------------------------------------------------------|-------------------------------------------|
| F4             | <i>MATa thr4</i>                                                                                   | G. Fink                                   |
| F15            | <i>MATa thr1 arg4</i>                                                                              | G. Fink                                   |
| Ybp249         | <i>MATa ade2-1 can1-100 his3-11,15 leu2-3,112 trp1-1 ura3-1 bar1Δ RAD5</i>                         | Moriel-Carretero M. And Aguilera A., 2010 |
| Ybp250         | <i>MATa ade2-1 can1-100 his3-11,15 leu2-3,112 trp1-1 ura3-1 bar1Δ RAD5</i>                         | Moriel-Carretero M. And Aguilera A., 2010 |
| YMK612         | <i>MATa leu2-3,112 trp1-1 can1-100 ura3-1 ade2-1 his3-11,15 URA3-1::ADH1-AtTIR1-9Myc (URA3)</i>    | Nishimura et al, 2009                     |
| hpr1-aid       | YMK612 <i>MATa ura3-3::ADH1-AtTIR1-9myc (URA3) RAD5 bar1Δ hpr1::hpr1-aid (hphB)</i>                | This study                                |
| hpr1-wt1       | YMK612 <i>MATa ura3-3::ADH1-AtTIR1-9myc (URA3) RAD5 bar1Δ</i>                                      | This study                                |
| hpr1-wt2       | YMK612 <i>MATa ura3-3::ADH1-AtTIR1-9myc (URA3) RAD5 bar1Δ</i>                                      | This study                                |
| sen1-aid       | YMK612 <i>MATa ura3-3::ADH1-AtTIR1-9myc (URA3) RAD5 bar1Δ sen1::sen1-aid (hphB)</i>                | This study                                |
| sen1-wt1       | YMK612 <i>MATa ura3-3::ADH1-AtTIR1-9myc (URA3) RAD5 bar1Δ</i>                                      | This study                                |
| sen1-wt2       | YMK612 <i>MATa ura3-3::ADH1-AtTIR1-9myc (URA3) RAD5 bar1Δ</i>                                      | This study                                |
| SEN1-R         | <i>MATa leu2-3,112 trp1-1 can1-100 ura3-1 ade2-1 his3-11,15 sen1-1 RAD5 bar1Δ</i>                  | García-Pichardo et al, 2017               |
| HPBAR1-R       | <i>MATa leu2-3,112 trp1-1 can1-100 ura3-1 ade2-1 his3-11,15 bar1Δ hpr1ΔHIS3 RAD5</i>               | This study                                |
| HPBAR1-R2      | <i>MATa leu2-3,112 trp1-1 can1-100 ura3-1 ade2-1 his3-11,15 bar1ΔHyg hpr1ΔHIS3 RAD5</i>            | This study                                |
| hpr1-d1 BrdU 7 | YMK612 <i>MATa ura3-3::ADH1-AtTIR1-9myc (URA3) hpr1::hpr1-aid (hphB) RAD5 bar1Δ HIS3::BrdU-Inc</i> | This study                                |
| WT-d1 BrdU 1   | YMK612 <i>MATa ura3-3::ADH1-At-TIR1-9myc (URA3) RAD5 HIS3::BrdU-Inc</i>                            | This study                                |
| sen1-d1 BrdU 2 | YMK612 <i>MATa ura3-3::ADH1-AtTIR1-9myc (URA3) sen1::sen1-aid (hphB) RAD5 bar1Δ HIS3::BrdU-Inc</i> | This study                                |

Supplementary Table 2. DNA primers used in standard PCR

| Standard PCR     |                                                                                          |                                                             |
|------------------|------------------------------------------------------------------------------------------|-------------------------------------------------------------|
| Primer           | Sequence 5' to 3'                                                                        | Use                                                         |
| RAD5 UP          | GCAGCAGGACCATGTAAACG                                                                     | Check RAD5 strains                                          |
| RAD5 LOW         | AAACTCGTTACTCCACTGCG                                                                     | Check RAD5 strains                                          |
| HPR1 TAG DOWN    | GAAGATAACAATGCAGCTACTTCGAACATTTCTAATGGTTC<br>ATCTACCCAAGATATGAAA CGT ACG CTG CAG GTC GAC | Generate degron strains                                     |
| HPR1 TAG UP      | TCTCTGATAGGATCTCTGTGGTACGCTAAAATCTATCTGAA<br>TTGTTTGGGACACTATGCA TCGATGAATTCGAGCTCG      | Generate degron strains                                     |
| comp HPR1 DOWN   | GGAGTTTGCTCCACAGAATAC                                                                    | Check degron strains                                        |
| comp HPR1 UP     | CTAAGGACGTTATTGACGCCTG                                                                   | Check degron strains                                        |
| SEN1 TAG DOWN    | AGTTCGAGACGGAATGCTTCATCTAGCCCATTATCCCAA<br>AAAAAGAAAGCCTAGATCA CGTACG CTGCAGGTCGAC       | Generate degron strains                                     |
| SEN1 TAG UP      | AATAATGAAAAATAATGAAAAATAATGTTGCTATTAATCA<br>ATATAAATGTATACACCTCGATGAATTCGAGCTCG          | Generate degron strains                                     |
| comp SEN1 DOWN   | CCGCAACCACAATCTTCAGC                                                                     | Check degron strains                                        |
| comp SEN1 UP     | GACTCCCTCATTCTTGTTGC                                                                     | Check degron strains                                        |
| IAA (A) comp     | AGAACGTGATGGTTTCCTGCC                                                                    | Check degron strains                                        |
| IAA (B) comp     | TTTTGGCAGGAAACCATCAG                                                                     | Check degron strains                                        |
| BAR1 C           | TTAGAGATGCGTTGTCCCTG                                                                     | Generate <i>bar1Δ</i> strains                               |
| BAR1 D           | TACGGACGTTTAGGATGACG                                                                     | Generate <i>bar1Δ</i> strains                               |
| COMP BAR-HYG REV | GTCAGGCTCTCGCTGAATTC                                                                     | Check <i>bar1Δ</i> strains                                  |
| SONDA HYG FOR    | GAC GTC TGT CGA GAA GTT TC                                                               | Check <i>bar1Δ</i> strains                                  |
| KANB             | CTGCAGCGAGGAGCCGTAAT                                                                     | Check KAN resistant strains                                 |
| NATF             | GCCACTGAGGTTCTTCTTTC                                                                     | Check NAT resistant strains                                 |
| SONDA TK UP      | GATGACTTACTGGCAGGTGC                                                                     | TK probe                                                    |
| SONDA TK DOWN    | ATGTGTCTGTCCCTCCGAAG                                                                     | TK probe                                                    |
| RS1              | TGAAAACCTCTGACACATGCAG                                                                   | Primer sequences for confirmation of BrdU-Inc constructions |
| RS2              | CTTGATTAGGGTGATGGTTCACG                                                                  | Primer sequences for confirmation of BrdU-Inc constructions |
| 5'His3           | CTACTATTGCTTTGCTGTGGG                                                                    | Primer sequences for confirmation of BrdU-Inc constructions |
| 3'His3           | GCCACCTATCACCACAATAAC                                                                    | Primer sequences for confirmation of BrdU-Inc constructions |

Supplementary Table 3. RT-qPCR primers used in this study

| RT-qPCR          |                                |                                                        |
|------------------|--------------------------------|--------------------------------------------------------|
| Primer           | Sequence 5' to 3'              | Use                                                    |
| GCN4 3' F        | TTGTGCCCGAATCCAGTGA            | ChIP/DRIP 3' region of the GCN4 gene                   |
| GCN4 3' R        | TGGCGGCTTCAGTGTCTTA            |                                                        |
| PDR5 F           | GTCAGAGGCTATATTTCACTGGAGAA     | ChIP/DRIP middle region of the PDR5 gene               |
| PDR5 R           | TACGTCTTGTTCGGCCTTAATC         |                                                        |
| SPF1 5' UP       | AGTCATTAATAGCAAAGCCGT          | ChIP/DRIP 5' region of the SPF1 gene                   |
| SPF1 5' DOWN     | GGTCCTTTGATGTAACGATCA          |                                                        |
| SPF1 3' UP       | CCCGTGGTAAACCTTTAGAAA          | ChIP/DRIP 3' region of the SPF1 gene                   |
| SPF1 3' DOWN     | ATATGAACGGCAAATTGAGAC          |                                                        |
| ARS1211 REG3 FWD | GTTCTCCACCTCCTTTGTGT           | ChIP/DRIP region 3 of the PDC1 gene                    |
| ARS1211 REG3 REV | TGACCGATATATTGTGTTTCTATACTGTGT |                                                        |
| ARS1211 REG4 FWD | CGTTCAATTCGTTGGCGTTAC          | ChIP/DRIP region 4 of the PDC1 gene                    |
| ARS1211 REG4 REV | TTAACACCGTTTTCGGTTTGC          |                                                        |
| NR UP            | TGCCTGCACGCCATTGT              | ChIP/DRIP late replicative control region chromosome V |
| NR LOW           | TTCCCCACGGAAAGTTGTATCT         |                                                        |
| SCR1 UP          | CGCACCGTGCCCTGTT               | RT-PCR                                                 |
| SCR1 LOW         | AGCTCTGCCCAGGACAAATTT          |                                                        |
| HPR1 FW          | TTTGAGGGAAAACCCGTTGA           | RT-PCR                                                 |
| HPR1 RV          | GCCCACGCTTTTTGTTAACTTC         |                                                        |

Supplementary Table 4. Plasmids used in this study.

| Name           | Description                                                                                                                                                                          | Source                                |
|----------------|--------------------------------------------------------------------------------------------------------------------------------------------------------------------------------------|---------------------------------------|
| pWJ1344        | YCp containing the RAD52::YFP fusion ( <i>LEU</i> marker)                                                                                                                            | Lisby et al. 2001                     |
| pSCH204        | YCp prs314-LB containing the <i>L-LacZ</i> recombination system under the LEU promoter with the 3 kb fragment BamHI from <i>LacZ</i> inserted between the <i>leu2</i> direct repeats | Chávez and Aguilera. 1997             |
| p403-BrdU-Inc  | pRS403 containing the BrdU-Inc cassette ( <i>ADH1</i> -hENT1 and GDP-HSV-TK constructions allowing BrdU incorporation)                                                               | Aparicio O. M. And Viggiani C.J. 2006 |
| pRS313         | YCp vector based on the <i>HIS3</i> marker.                                                                                                                                          | Hieter P. 1989                        |
| pRS313-GALRNH1 | YCp containing the <i>RNH1</i> gene under <i>GAL</i> promoter ( <i>HIS3</i> marker)                                                                                                  | García-Benítez et al. 2017            |
| pRS414-GAL1    | YCp vector based on the <i>TRP1</i> marker.                                                                                                                                          | Funk M. 1994                          |
| pCM184         | Centromeric plasmid containing Tet promoter and <i>TRP1</i> marker.                                                                                                                  | Gari et al. 1997                      |
| pCM184RNH1     | <i>RNH1</i> ORF cloned into pCM184 in NotI site                                                                                                                                      | Santos-Pereira et al. 2013            |
| pHyg-AID*-9myc | pSM409 vector containing AID tag with the selection marker hphNT1 and the extension 9myc used to generate degron strains.                                                            | Morawska and Ulrich 2013              |

Supplementary Table 5. Antibodies used in this study

| Antibodies                                |                                |                          |                                  |
|-------------------------------------------|--------------------------------|--------------------------|----------------------------------|
| Name                                      | Use                            | Source                   | Identifier                       |
| Mouse monoclonal c-Myc (Clone 9E10)       | WB (1:500)                     | Sigma-Aldrich            | Cat# M4439; RRID:AB_627268       |
| Mouse monoclonal anti-actin               | WB (1:2000)                    | Abcam                    | Cat# ab8224; RRID:AB_449644      |
| Rabbit polyclonal anti-actin              | WB (1:2000)                    | Abcam                    | Cat# ab8227; RRID:AB_2305186     |
| Rabbit polyclonal anti-H2A (Ser129)       | ChIP (5 $\mu$ l)               | Abcam                    | Cat# ab15083; RRID:AB_301630     |
| Rabbit polyclonal anti-H2A (Ser129)       | WB (1:1000)                    | Active motif             | Cat# 39235; RRID:AB_2687477      |
| Mouse monoclonal anti-BrdU                | ChIP (3 $\mu$ l)               | MBL                      | Cat# MI-11-3; RRID:AB_590678     |
| IRDye 800CW Goat anti-Rabbit IgG (H+L)    | WB (1:15000)                   | LI-COR Biosciences       | Cat# 925-32211; RRID AB_2651127  |
| IRDye 680RD Goat anti-mouse IgG (H+L)     | WB (1:15000)                   | LI-COR Biosciences       | Cat# 926-68070; RRID AB_10956588 |
| Alexa Fluor 555 Goat anti-mouse IgG (H+L) | IF (1:1000)                    | Thermo Fisher Scientific | Cat# A-21424; RRID AB_141780     |
| S9.6 antibody                             | IF (1:300)<br>DRIP (3 $\mu$ l) | Homemade                 |                                  |
